# Supplementary material for: Association between C-Maf-inducing protein gene rs2287112 polymorphism and schizophrenia
Source: PeerJ. 2021 Aug 20;9:e11907. doi: 10.7717/peerj.11907 (PMC8381876; doi:10.7717/peerj.11907)
Supplement: Supplemental Information 1 — Sex: 1 = male, 2 = female; Group: 1 = case, 0 = control [file peerj-09-11907-s001.xlsx]

## Sheet: Sheet1
ID	sex	age	group	rs77700579	rs12925980	rs3751859	rs2287112
3	1	34	1	AA	CC	GG	.
6	1	52	1	AA	TT	GA	.
231	1	50	1	AA	CT	GG	TT
285	1	30	1	AA	TT	GG	.
302	1	18	1	TA	CC	GA	TT
366	1	39	1	AA	TT	AA	GT
423	1	21	1	AA	.	GG	TT
595	1	18	1	AA	CC	GG	TT
725	1	22	1	AA	CC	GG	TT
726	1	14	1	AA	CT	GA	TT
730	1	27	1	TA	CT	GG	TT
833	1	55	1	AA	CT	GG	TT
945	1	34	1	TA	TT	GA	.
1001	1	36	1	AA	CT	GA	.
10041	1	43	0	AA	CT	GA	TT
287	1	48	1	AA	CT	GA	.
288	1	36	1	AA	CT	GG	TT
823	1	32	1	AA	CC	GA	TT
894	1	24	1	AA	CT	GA	TT
2	1	34	1	.	.	.	.
4	1	52	1	AA	TT	.	.
27	1	50	1	.	.	.	.
28	1	23	1	AA	.	.	.
66	1	45	1	AA	CT	GG	.
244	1	47	1	TA	.	.	.
270	1	56	1	AA	CC	GA	TT
272	1	50	1	AA	TT	GG	.
293	1	44	1	AA	CT	GA	TT
590	1	31	1	AA	CC	GG	.
669	1	52	1	TA	.	GG	.
736	1	32	1	AA	CT	GG	.
747	1	32	1	AA	CC	GG	.
749	1	28	1	.	.	.	.
773	1	25	1	.	.	GG	.
815	1	80	1	AA	TT	AA	TT
901	1	57	1	.	.	.	.
1107	1	30	1	.	.	.	.
10110	1	51	0	TA	CT	GG	TT
C46	1	19	0	.	.	.	.
271	1	34	1	AA	CT	GG	GT
369	1	54	1	AA	CT	GA	TT
449	1	26	1	AA	CT	GA	TT
615	1	23	1	TA	CC	GG	TT
648	1	38	1	TA	TT	GG	GT
656	1	23	1	AA	CC	GG	TT
663	1	34	1	AA	CT	AA	TT
683	1	41	1	TA	CC	GG	TT
717	1	38	1	AA	CT	GA	TT
764	1	25	1	AA	CC	GG	TT
779	1	32	1	AA	CT	GA	GT
780	1	26	1	AA	TT	GA	TT
821	1	21	1	AA	CT	GA	GT
980	1	35	1	AA	TT	GA	TT
652	1	40	1	AA	CC	GG	TT
653	1	48	1	AA	CT	GA	TT
787	1	51	1	AA	CT	GG	GT
24	1	17	1	AA	CT	GA	TT
184	1	18	1	TA	CC	GA	TT
263	1	43	1	AA	CC	GG	TT
353	1	28	1	TA	CT	GA	TT
364	1	41	1	TT	CC	GG	TT
365	1	47	1	AA	CT	GG	TT
368	1	39	1	AA	CT	AA	TT
378	1	32	1	AA	CC	GA	TT
380	1	28	1	AA	TT	AA	GT
383	1	35	1	AA	TT	GA	TT
385	1	27	1	AA	CC	GA	TT
386	1	64	1	AA	CT	GG	TT
389	1	28	1	AA	CT	GA	TT
391	1	35	1	TA	CC	AA	TT
393	1	49	1	AA	CT	GG	TT
401	1	34	1	AA	CC	GG	TT
425	1	18	1	.	CT	GG	TT
426	1	35	1	.	CT	GG	TT
436	1	20	1	AA	CT	GG	TT
448	1	35	1	AA	CC	GA	TT
494	1	67	1	AA	CC	GG	TT
522	1	31	1	AA	TT	GA	GG
584	1	35	1	TA	CT	GA	TT
646	1	30	1	AA	CT	GA	TT
649	1	38	1	AA	CT	GG	TT
651	1	25	1	AA	TT	GG	TT
655	1	20	1	AA	CC	GA	TT
662	1	26	1	AA	CT	GA	TT
668	1	44	1	AA	CC	GG	TT
678	1	45	1	AA	CT	GG	TT
727	1	23	1	AA	CT	GG	TT
731	1	20	1	AA	CC	GG	TT
737	1	34	1	AA	CT	GG	GG
739	1	22	1	AA	TT	GG	GT
751	1	30	1	AA	CC	GG	TT
752	1	36	1	AA	CT	GG	TT
753	1	28	1	AA	TT	GG	GT
755	1	20	1	AA	TT	GG	GG
784	1	26	1	TA	TT	AA	TT
798	1	23	1	TA	CT	GG	TT
802	1	46	1	AA	TT	GA	GT
822	1	40	1	AA	CC	GA	TT
842	1	43	1	AA	CC	GA	TT
863	1	37	1	AA	CC	GG	TT
893	1	28	1	AA	CT	GA	GT
899	1	26	1	AA	CC	GG	TT
909	1	18	1	AA	CT	GA	TT
960	1	21	1	TA	CT	GA	TT
969	1	48	1	AA	CT	GA	TT
981	1	19	1	AA	TT	GA	TT
1147	1	22	1	AA	CT	GG	TT
1169	1	18	1	AA	TT	GA	GT
1179	1	18	1	AA	TT	GG	TT
360	1	22	1	AA	CT	GA	GT
392	1	21	1	AA	CT	GA	GG
417	1	41	1	AA	CC	GA	TT
437	1	25	1	AA	CT	GA	TT
498	1	26	1	AA	CC	GA	TT
732	1	38	1	AA	CC	GG	TT
735	1	28	1	AA	TT	GG	GT
766	1	21	1	AA	CC	AA	TT
818	1	20	1	AA	CT	GG	GG
831	1	37	1	AA	TT	GA	GG
25	1	81	1	TT	CT	GG	TT
277	1	36	1	AA	CT	GG	TT
362	1	49	1	AA	CC	GG	TT
363	1	20	1	AA	CT	GA	TT
371	1	23	1	AA	CT	GG	GG
375	1	17	1	TA	CC	AA	TT
379	1	23	1	AA	CC	GG	TT
382	1	33	1	TA	CT	GA	TT
390	1	45	1	AA	CT	GG	TT
444	1	37	1	AA	CT	AA	GT
465	1	33	1	AA	CT	GA	TT
650	1	33	1	AA	CC	GG	TT
657	1	25	1	AA	CT	AA	TT
658	1	21	1	AA	CT	GA	TT
660	1	31	1	AA	CT	GA	TT
661	1	20	1	TA	CT	GA	TT
667	1	35	1	AA	CC	GA	TT
673	1	34	1	AA	TT	GG	TT
676	1	38	1	AA	CT	GG	TT
682	1	75	1	AA	TT	GG	GT
721	1	33	1	AA	CC	GA	TT
740	1	66	1	AA	CC	GG	TT
741	1	31	1	AA	CC	GA	TT
742	1	48	1	AA	CT	GG	TT
743	1	48	1	AA	CT	GG	TT
746	1	29	1	AA	CT	GG	GT
748	1	25	1	TA	TT	GG	TT
750	1	37	1	AA	CT	AA	TT
761	1	28	1	TA	CT	GG	TT
771	1	44	1	AA	CC	GG	TT
776	1	32	1	AA	CC	GG	TT
782	1	20	1	AA	TT	GA	TT
828	1	44	1	AA	CT	GA	TT
838	1	70	1	TT	TT	GA	GT
845	1	42	1	AA	CT	GA	GT
847	1	37	1	AA	CT	GG	TT
860	1	20	1	TA	CC	GA	TT
892	1	40	1	AA	TT	GA	TT
897	1	62	1	AA	CC	GA	TT
906	1	50	1	TA	CC	GA	TT
910	1	27	1	AA	CC	GG	TT
935	1	17	1	AA	CC	GG	TT
962	1	20	1	AA	CT	GG	TT
966	1	52	1	AA	TT	GA	TT
1101	1	26	1	AA	TT	GG	GT
1103	1	26	1	TA	TT	GG	GG
11266	1	36	0	AA	CC	GA	TT
367	1	25	1	TA	CC	GG	TT
376	1	21	1	AA	TT	GA	TT
408	1	19	1	AA	CC	AA	TT
424	1	21	1	AA	TT	GG	GT
430	1	40	1	TA	CT	GG	GT
497	1	37	1	AA	CC	GA	TT
665	1	25	1	AA	CT	GA	TT
679	1	50	1	AA	CC	GG	TT
719	1	28	1	AA	CT	GA	GT
744	1	21	1	AA	TT	GA	GT
769	1	43	1	AA	CC	GA	TT
830	1	28	1	AA	CT	GA	GT
895	1	30	1	AA	CT	GG	TT
900	1	30	1	AA	CC	AA	TT
913	1	26	1	AA	CC	GG	TT
923	1	19	1	AA	TT	AA	GT
967	1	52	1	AA	TT	GG	TT
1099	1	22	1	AA	CC	GA	TT
805	1	41	1	AA	CC	GG	TT
919	1	22	1	AA	TT	GA	GG
7	1	44	1	AA	CT	GA	GT
67	1	33	1	AA	CC	AA	TT
117	1	19	1	AA	CC	GA	TT
125	1	22	1	TA	TT	GG	TT
134	1	39	1	AA	CC	GG	TT
139	1	22	1	AA	CT	AA	TT
156	1	25	1	AA	CC	GA	TT
157	1	20	1	AA	CC	AA	TT
158	1	49	1	AA	CT	GG	GT
159	1	43	1	AA	CT	GG	TT
163	1	48	1	AA	CC	GG	TT
164	1	21	1	TA	CT	GG	TT
168	1	57	1	TA	CT	GA	GT
170	1	34	1	AA	TT	GA	TT
237	1	44	1	TA	CT	GG	GT
238	1	41	1	AA	CT	GA	GT
253	1	34	1	AA	CT	GA	TT
260	1	54	1	AA	CC	GG	TT
266	1	30	1	TA	CT	GA	TT
273	1	36	1	AA	TT	GA	TT
276	1	41	1	TA	.	.	TT
289	1	52	1	AA	CT	GA	TT
299	1	39	1	AA	CC	AA	TT
399	1	28	1	AA	CT	GA	TT
415	1	20	1	AA	CT	GA	TT
429	1	52	1	AA	CT	GG	TT
510	1	28	1	TA	.	.	GT
512	1	26	1	AA	CT	GG	GT
572	1	28	1	AA	CT	AA	TT
583	1	19	1	TA	CT	GA	TT
589	1	42	1	AA	CT	AA	TT
591	1	27	1	TA	CC	GG	TT
592	1	42	1	AA	CC	GG	TT
593	1	34	1	AA	CT	GG	GT
605	1	20	1	AA	CT	GG	GT
620	1	26	1	AA	CT	AA	TT
622	1	40	1	AA	CC	AA	TT
625	1	21	1	AA	CT	GG	GT
628	1	35	1	AA	CC	GA	TT
634	1	40	1	AA	CC	GG	TT
635	1	19	1	AA	CC	GA	TT
636	1	26	1	TA	CC	GG	TT
637	1	31	1	AA	CC	GG	TT
638	1	65	1	AA	CT	GA	TT
715	1	20	1	AA	CT	GG	TT
770	1	17	1	AA	CT	GG	TT
827	1	35	1	TA	CC	GA	TT
837	1	56	1	TA	TT	GA	GT
864	1	16	1	AA	CT	GA	GT
870	1	32	1	AA	CT	GG	TT
921	1	19	1	AA	CT	GA	TT
924	1	46	1	AA	CC	GG	TT
956	1	35	1	AA	CC	GG	TT
992	1	42	1	AA	CC	GA	TT
1015	1	29	1	AA	CT	GA	TT
1205	1	36	0	AA	CT	GG	TT
1208	1	38	0	AA	TT	GA	GT
1212	1	29	0	AA	CC	GA	TT
1213	1	71	0	AA	CC	GA	TT
1217	1	38	0	AA	CT	GA	TT
1218	1	36	0	AA	TT	GA	GT
1222	1	38	0	AA	CT	GA	TT
1225	1	38	0	AA	CT	GA	TT
1228	1	27	0	AA	TT	GA	TT
1231	1	23	0	AA	TT	GG	TT
1234	1	34	0	AA	CT	GA	TT
1235	1	21	0	AA	CT	GA	TT
1236	1	40	0	TA	CC	GG	TT
1240	1	23	0	AA	CT	GA	TT
1241	1	35	0	AA	CC	GG	TT
1242	1	32	0	AA	TT	GA	TT
1245	1	37	0	AA	CC	GG	TT
1273	1	42	0	AA	CC	GA	TT
1275	1	53	0	AA	CT	GA	TT
1288	1	53	0	AA	CT	GA	TT
1315	1	53	0	AA	CT	GG	GT
1338	1	52	0	AA	CC	AA	TT
1513	1	48	0	AA	CT	GG	TT
1519	1	39	0	AA	CC	GG	TT
1525	1	48	0	AA	CT	AA	TT
1532	1	43	0	AA	CC	GA	TT
1534	1	52	0	AA	CC	GG	TT
1800	1	58	0	AA	CT	GG	GT
1824	1	27	0	TA	CC	AA	TT
1957	1	38	0	TA	CT	GA	TT
1962	1	33	0	AA	CC	GA	TT
1968	1	28	0	AA	CT	GG	GT
2010	1	28	0	AA	TT	GG	GT
2090	1	70	0	AA	CT	GG	GT
2168	1	60	0	AA	CC	GG	TT
2178	1	53	0	AA	TT	GG	TT
2181	1	48	0	AA	CC	GG	TT
2199	1	38	0	AA	CC	GA	TT
2222	1	29	0	AA	TT	GG	GT
2248	1	26	0	AA	CT	GA	GT
2282	1	43	0	AA	CT	AA	TT
2319	1	36	0	TA	CC	GG	TT
2321	1	25	0	AA	CT	GG	GT
2332	1	57	0	AA	TT	GG	TT
2347	1	41	0	AA	CT	GG	TT
2406	1	48	0	AA	CC	GG	TT
2718	1	53	0	TA	TT	GA	TT
2729	1	53	0	AA	TT	GA	GG
2804	1	29	0	AA	CC	GG	TT
2913	1	53	0	AA	CC	GA	TT
2926	1	57	0	AA	CC	AA	TT
3219	1	29	0	TA	CT	GA	TT
3224	1	48	0	AA	CT	GG	TT
3284	1	27	0	TA	CC	GA	TT
3430	1	47	0	AA	CC	GG	TT
3471	1	50	0	TA	CC	AA	TT
3478	1	53	0	AA	CT	GG	GT
3499	1	40	0	AA	CC	GG	TT
3550	1	45	0	AA	CT	GA	TT
3552	1	37	0	AA	CT	GG	TT
3565	1	42	0	AA	CT	GG	TT
3566	1	42	0	TA	CT	GA	GT
3575	1	28	0	AA	CC	GG	TT
3583	1	53	0	AA	CC	GG	TT
3605	1	42	0	AA	CT	GG	TT
3621	1	42	0	TA	CT	GG	TT
3631	1	53	0	AA	CC	GA	TT
3652	1	50	0	AA	CC	GA	TT
3674	1	57	0	AA	CT	GA	TT
3684	1	29	0	TA	TT	GA	TT
3877	1	62	0	AA	CT	GA	GT
3881	1	51	0	TA	CC	GG	TT
3948	1	35	0	AA	CC	AA	TT
3950	1	32	0	TT	CT	GA	GT
3956	1	60	0	TA	CT	GG	TT
3972	1	28	0	AA	TT	GG	GT
4008	1	45	0	AA	CC	GG	TT
4009	1	44	0	AA	TT	GG	GT
4015	1	41	0	AA	CT	GG	GT
4030	1	41	0	TA	CT	GA	GT
4031	1	41	0	AA	TT	GA	TT
4032	1	47	0	AA	CT	GA	TT
4036	1	36	0	TA	CT	AA	TT
4086	1	52	0	TA	CT	GG	TT
4088	1	43	0	AA	CC	GG	TT
4098	1	19	0	AA	CC	GA	TT
4104	1	19	0	TA	CC	GG	TT
4112	1	36	0	AA	CT	GG	GT
4139	1	53	0	AA	CT	GG	TT
10012	1	23	0	AA	TT	GG	TT
10016	1	27	0	AA	CT	GA	TT
10017	1	22	0	AA	CT	GG	GT
10028	1	22	0	AA	CT	GA	TT
10035	1	21	0	AA	CT	GA	TT
10059	1	25	0	AA	CC	GA	TT
10061	1	39	0	AA	TT	GG	GG
10070	1	20	0	AA	CT	GA	TT
10083	1	26	0	TT	CC	GG	TT
10090	1	38	0	TA	CT	GA	GT
10101	1	29	0	AA	CC	GA	TT
10102	1	54	0	AA	CT	GA	TT
10106	1	27	0	AA	CT	AA	TT
10145	1	34	0	TA	CC	GA	TT
10146	1	22	0	AA	CT	GG	GT
10148	1	22	0	TA	CT	GA	GT
10156	1	45	0	AA	CT	GA	GT
10181	1	19	0	TA	CC	GG	TT
10195	1	24	0	AA	CT	AA	GT
10197	1	31	0	AA	CT	GG	TT
10206	1	54	0	AA	CT	GG	GT
10210	1	26	0	AA	TT	GG	TT
10212	1	21	0	TA	TT	GG	GT
10268	1	19	0	AA	CT	GA	GT
10281	1	41	0	AA	CC	AA	TT
10288	1	33	0	AA	CT	GA	TT
10326	1	20	0	AA	CT	GG	TT
10327	1	21	0	AA	CC	AA	TT
10377	1	42	0	AA	CC	GG	TT
10415	1	33	0	AA	CC	GA	TT
10419	1	31	0	AA	CT	AA	TT
10497	1	26	0	AA	CC	GA	TT
10506	1	19	0	AA	CC	GG	TT
10798	1	26	0	AA	CT	GG	TT
11009	1	20	0	AA	TT	GA	TT
11796	1	40	0	AA	CC	GG	TT
30004	1	51	1	AA	CC	GA	TT
40009	1	46	1	AA	TT	GG	TT
C1058	1	50	0	TA	CT	GG	TT
C1070	1	45	0	TA	CT	AA	TT
C1167	1	38	0	TA	CC	GA	TT
C1173	1	17	0	TA	CT	GG	GT
C1178	1	36	0	AA	CT	GG	GT
C1180	1	28	0	AA	CT	GG	TT
C1184	1	38	0	AA	CT	GG	GT
C211	1	54	0	AA	CC	GG	TT
C927	1	34	0	AA	CT	GG	TT
Z1	1	22	0	AA	CT	GG	TT
Z2	1	17	0	TA	CT	GA	TT
Z23	1	31	0	AA	TT	GG	GT
Z3	1	24	0	TA	TT	GG	TT
Z4	1	28	0	AA	TT	GG	TT
Z6	1	26	0	AA	CC	GA	TT
Z7	1	27	0	AA	CT	AA	TT
136	1	28	1	AA	CC	AA	TT
144	1	24	1	AA	CT	GG	GT
155	1	23	1	AA	TT	GG	GT
361	1	36	1	AA	CT	GG	TT
619	1	18	1	AA	CT	GA	GT
632	1	25	1	AA	CC	GG	TT
911	1	49	1	AA	CT	GG	TT
1230	1	36	0	AA	CT	GG	GT
1232	1	33	0	AA	TT	GG	TT
1244	1	24	0	AA	CT	GG	GT
1267	1	51	0	AA	CT	GA	TT
1278	1	51	0	AA	CC	GA	TT
1588	1	25	0	TA	CC	GA	TT
2140	1	39	0	AA	CC	GA	TT
2668	1	43	0	AA	TT	GA	GT
2723	1	51	0	AA	CT	GG	GT
2814	1	53	0	AA	TT	GA	GG
3442	1	47	0	AA	CT	GA	TT
3503	1	45	0	AA	CT	AA	GT
3589	1	47	0	AA	CC	GG	TT
3610	1	42	0	AA	CT	GG	TT
3614	1	42	0	AA	CT	GG	GT
4087	1	62	0	AA	TT	GA	GT
4125	1	20	0	AA	TT	GG	GT
10008	1	39	0	AA	CC	GG	TT
10034	1	34	0	AA	CC	GG	TT
10152	1	24	0	TA	TT	GG	TT
10242	1	21	0	AA	CC	GA	TT
10286	1	38	0	AA	CT	AA	TT
11273	1	31	0	AA	CC	GA	TT
40007	1	46	1	AA	CC	GG	TT
C720	1	48	0	AA	CC	GA	TT
T9	1	27	1	AA	CC	GG	TT
Z14	1	36	0	TA	CT	GA	GT
Z5	1	25	0	AA	CT	GG	GT
943	1	27	1	AA	CC	GG	TT
10182	1	28	0	AA	CC	GA	TT
976	1	24	1	.	.	.	.
438	1	30	1	AA	CT	GA	TT
10355	1	29	0	AA	TT	GA	TT
30020	1	31	1	AA	CT	AA	TT
30030	1	47	1	AA	TT	GG	GT
40015	1	46	1	TA	CT	GG	GT
40129	1	46	1	AA	CT	GA	TT
455	1	37	1	AA	CC	GA	TT
515	1	31	1	AA	CC	AA	TT
10105	1	33	0	AA	CC	GG	TT
30023	1	68	1	TA	CT	AA	GT
458	1	28	1	AA	CC	.	TT
964	1	27	1	AA	CC	GA	TT
10379	1	25	0	AA	TT	GA	GG
10505	1	25	0	AA	TT	GA	GT
10535	1	21	0	AA	CT	GG	TT
11727	1	39	0	TT	CT	GA	TT
30024	1	35	1	TT	CC	GG	TT
40017	1	46	1	TA	CT	GG	TT
40028	1	46	1	TA	TT	GA	TT
40035	1	45	1	AA	TT	GA	GG
40102	1	46	1	AA	CT	GA	GT
40109	1	46	1	AA	TT	GA	TT
40110	1	47	1	AA	CT	GG	GT
40113	1	47	1	TA	CT	GA	GT
40124	1	46	1	TA	CC	AA	TT
40126	1	47	1	AA	CC	GG	TT
40127	1	45	1	AA	CT	GG	TT
40130	1	47	1	AA	CC	GG	TT
40131	1	46	1	AA	CT	GA	TT
10115	1	26	0	AA	CT	AA	TT
10127	1	36	0	AA	CT	GA	GT
30010	1	64	1	AA	CT	AA	TT
30013	1	29	1	AA	CT	GA	GT
40111	1	47	1	AA	CC	GA	TT
11589	1	45	0	AA	CC	GG	TT
280	1	50	1	TA	CC	GG	TT
350	1	16	1	AA	CT	GG	GT
567	1	19	1	AA	TT	GG	GG
978	1	61	1	AA	CT	GA	GT
10079	1	29	0	AA	CT	GA	TT
10282	1	38	0	AA	CT	GA	GT
10800	1	44	0	AA	CT	GG	TT
10848	1	43	0	AA	TT	GG	TT
11731	1	50	0	TA	CT	GG	TT
11798	1	35	0	TA	TT	GG	GT
30001	1	57	1	AA	CC	GG	TT
30003	1	49	1	AA	CC	GG	TT
30005	1	40	1	AA	CT	GA	GT
30025	1	61	1	AA	CT	GA	TT
40012	1	45	1	TA	CT	GG	TT
40039	1	46	1	AA	TT	GA	TT
40040	1	47	1	AA	CT	GA	TT
40041	1	46	1	TA	CC	GA	TT
40094	1	47	1	AA	CT	GG	TT
40101	1	46	1	AA	CT	GG	TT
40104	1	45	1	AA	TT	GA	GT
40112	1	48	1	AA	CC	GA	TT
40114	1	47	1	AA	CT	GA	TT
40116	1	45	1	AA	CT	GG	GT
40122	1	46	1	AA	TT	GA	TT
40123	1	48	1	AA	TT	GG	TT
40125	1	47	1	AA	TT	GG	GT
40132	1	47	1	TA	CC	GG	TT
10196	1	18	0	AA	CT	GG	GT
40016	1	45	1	AA	CT	GA	GT
40038	1	47	1	TA	CT	GA	TT
40105	1	46	1	AA	CC	GG	TT
10558	1	33	0	TA	CT	GG	TT
40133	1	46	1	AA	CC	AA	TT
138	1	23	1	AA	CC	GA	TT
185	1	35	1	AA	CC	AA	TT
291	1	34	1	AA	CT	GG	GT
296	1	26	1	AA	CC	GA	TT
396	1	23	1	TA	CT	GA	TT
501	1	20	1	AA	TT	GG	GT
504	1	29	1	TA	CT	GA	GT
517	1	19	1	TT	CT	GA	TT
577	1	26	1	AA	CT	GG	GT
630	1	28	1	AA	TT	GG	GT
824	1	25	1	AA	CT	AA	TT
959	1	50	1	AA	CT	GA	TT
961	1	30	1	AA	CT	GG	TT
977	1	36	1	TA	CT	GA	TT
994	1	30	1	AA	CC	GA	TT
1214	1	26	0	TA	CC	GG	TT
1238	1	54	0	AA	CT	GA	GT
3173	1	29	0	AA	CT	GA	TT
10619	1	45	0	TA	CT	GA	TT
10726	1	18	0	AA	CC	GG	TT
10878	1	31	0	TA	CC	GG	TT
10964	1	22	0	TA	CT	GG	TT
11065	1	30	0	AA	TT	AA	TT
11067	1	37	0	AA	CC	GG	TT
11084	1	27	0	AA	CT	GA	GT
11303	1	42	0	TA	CT	GG	TT
11306	1	25	0	AA	CT	GG	GT
11312	1	46	0	AA	CC	GA	TT
11351	1	39	0	AA	CT	GG	TT
11373	1	36	0	AA	CT	GG	TT
C1183	1	37	0	AA	CC	GA	TT
C388	1	38	0	AA	CC	AA	TT
C41	1	19	0	TA	CT	GG	GT
C426	1	52	0	AA	CT	GA	GT
C466	1	33	0	AA	TT	GA	TT
C503	1	28	0	TT	TT	GG	TT
T15	1	32	1	AA	CT	GG	TT
502	1	45	1	AA	CC	AA	TT
633	1	34	1	AA	CC	AA	TT
10496	1	27	0	AA	CC	GA	TT
11295	1	52	0	AA	CC	GG	TT
C318	1	41	0	AA	CC	GA	TT
C340	1	40	0	AA	TT	GG	GT
115	1	20	1	AA	CT	GG	GT
119	1	22	1	AA	CC	GG	TT
130	1	30	1	AA	TT	GG	TT
131	1	24	1	TA	CT	GA	TT
172	1	36	1	AA	CT	GG	TT
267	1	50	1	AA	TT	GG	.
269	1	28	1	AA	CT	GA	TT
278	1	23	1	AA	CC	GA	TT
281	1	46	1	AA	CT	GG	TT
290	1	26	1	AA	CC	GG	TT
338	1	27	1	AA	CT	GA	TT
394	1	42	1	AA	TT	GA	GT
395	1	26	1	AA	CC	GA	TT
400	1	36	1	AA	CT	GA	GT
403	1	28	1	AA	CT	GG	TT
404	1	38	1	AA	TT	AA	TT
427	1	28	1	AA	TT	GG	TT
428	1	20	1	AA	CT	GG	.
431	1	33	1	TA	CC	GG	TT
447	1	33	1	AA	CT	GA	TT
499	1	43	1	AA	TT	GA	GT
508	1	33	1	AA	CC	GA	TT
511	1	33	1	AA	CT	GG	TT
516	1	39	1	TA	CC	GA	TT
520	1	31	1	AA	CT	GG	GT
526	1	28	1	AA	CT	GA	TT
533	1	25	1	AA	CC	GG	TT
536	1	28	1	AA	TT	GA	TT
540	1	38	1	AA	TT	GA	TT
559	1	35	1	TA	CT	GG	GG
566	1	21	1	AA	CT	GA	TT
571	1	39	1	TA	CT	GG	TT
574	1	43	1	AA	CT	GA	TT
576	1	19	1	AA	CT	GG	GT
582	1	27	1	AA	CC	GG	TT
588	1	26	1	AA	CC	GG	TT
606	1	22	1	AA	CT	GG	TT
618	1	31	1	AA	CT	GA	TT
644	1	49	1	TA	CC	GA	TT
659	1	34	1	AA	TT	AA	GT
670	1	46	1	AA	CT	GA	TT
723	1	25	1	AA	CT	AA	TT
759	1	21	1	AA	CT	GA	TT
936	1	30	1	AA	CT	GA	GG
987	1	38	1	AA	CT	GG	TT
988	1	30	1	AA	CT	GG	GT
1005	1	16	1	AA	CT	GA	TT
1095	1	52	1	AA	CT	GG	GT
3255	1	55	0	AA	CT	GG	TT
3463	1	56	0	AA	CC	AA	TT
3467	1	30	0	TA	CT	GG	TT
10004	1	33	0	AA	TT	GG	GT
10108	1	32	0	TA	CT	GG	TT
10211	1	20	0	AA	CC	GA	TT
10344	1	20	0	AA	CT	GG	GT
10411	1	25	0	AA	CT	GA	TT
10516	1	21	0	AA	CC	AA	TT
10526	1	29	0	AA	CC	GG	TT
10528	1	20	0	AA	CC	GA	TT
10529	1	22	0	AA	CC	AA	TT
10530	1	25	0	AA	TT	GG	GT
10531	1	24	0	AA	CT	GG	TT
10532	1	21	0	TA	CC	GA	TT
10540	1	36	0	AA	CT	GG	TT
10545	1	38	0	TT	CT	GA	TT
10557	1	40	0	TA	TT	GA	TT
10605	1	26	0	AA	CT	GG	TT
10606	1	44	0	AA	TT	GG	TT
10697	1	21	0	AA	CT	GG	TT
10699	1	18	0	AA	CT	GA	TT
10706	1	39	0	AA	CT	GG	TT
10762	1	23	0	AA	CT	GG	TT
10802	1	41	0	TA	TT	GG	TT
10804	1	38	0	AA	CT	GA	TT
10871	1	32	0	AA	CC	GG	TT
10907	1	24	0	AA	CC	GG	TT
10910	1	29	0	AA	CC	AA	TT
10915	1	34	0	AA	TT	GG	GT
10922	1	35	0	AA	CT	GG	TT
10942	1	32	0	TA	CT	GG	TT
10944	1	33	0	AA	CC	GG	TT
10954	1	48	0	TA	CC	GA	TT
10957	1	54	0	AA	TT	GA	GT
10958	1	53	0	AA	CT	AA	TT
10963	1	54	0	TA	CC	GG	TT
10965	1	21	0	AA	CT	GG	GT
10970	1	40	0	AA	CC	GG	TT
10979	1	23	0	TA	CT	GG	TT
11007	1	21	0	AA	CT	GA	TT
11048	1	38	0	AA	CT	GA	GT
11051	1	27	0	AA	CT	GG	GT
11061	1	25	0	AA	TT	GG	TT
11062	1	23	0	AA	CC	GA	TT
11066	1	19	0	AA	CT	GA	TT
11071	1	18	0	AA	CC	GA	TT
11096	1	43	0	AA	CT	GG	GT
11108	1	42	0	TA	CT	GG	TT
11289	1	30	0	AA	TT	GA	TT
11300	1	52	0	AA	CT	GG	TT
11336	1	26	0	AA	CT	GA	TT
11346	1	40	0	AA	CC	GG	TT
11361	1	29	0	AA	CT	GA	TT
11391	1	53	0	AA	CC	GG	TT
11392	1	44	0	AA	TT	GA	TT
11394	1	44	0	TA	CC	AA	TT
11409	1	45	0	TA	CT	GG	TT
11424	1	39	0	AA	CT	GA	TT
11474	1	39	0	AA	CC	GG	TT
11524	1	29	0	AA	TT	AA	GG
11538	1	40	0	AA	CT	GA	TT
C202	1	45	0	AA	CC	GA	TT
C207	1	29	0	AA	CT	GA	TT
C224	1	50	0	AA	CC	GG	TT
C225	1	51	0	TT	CC	GG	TT
C234	1	49	0	AA	CT	GG	TT
C237	1	46	0	AA	CC	GG	TT
C243	1	48	0	AA	CC	GA	TT
C246	1	48	0	AA	TT	GA	GT
C249	1	52	0	TA	CC	GA	TT
C252	1	48	0	TA	TT	GG	TT
C271	1	53	0	AA	CC	GG	TT
C357	1	43	0	AA	TT	AA	GT
C411	1	41	0	TA	CT	GA	GT
C483	1	25	0	AA	CT	GG	TT
T1	1	31	1	AA	CC	GG	TT
T5	1	28	1	AA	CC	GA	TT
T8	1	17	1	TA	CT	AA	TT
143	1	21	1	TA	CT	GG	TT
165	1	25	1	AA	TT	GG	GT
433	1	69	1	AA	TT	GG	GT
439	1	25	1	AA	CT	GA	TT
518	1	23	1	AA	CC	AA	TT
521	1	24	1	AA	CC	GG	TT
575	1	30	1	AA	CC	AA	TT
760	1	24	1	AA	CC	GG	TT
3488	1	70	0	AA	CT	GG	TT
10376	1	22	0	AA	CT	AA	TT
10391	1	24	0	AA	CT	GA	GT
10524	1	19	0	AA	CT	GA	GT
10552	1	24	0	AA	CT	GG	TT
10724	1	23	0	AA	CT	GA	TT
10743	1	26	0	AA	CC	GG	TT
11063	1	20	0	AA	CC	GA	TT
11069	1	30	0	AA	CC	AA	TT
11083	1	30	0	AA	TT	GA	GG
11390	1	53	0	TA	CT	AA	TT
11626	1	36	0	AA	CT	GA	TT
C220	1	51	0	AA	CT	GG	GT
C417	1	28	0	AA	CC	GG	TT
T7	1	24	1	AA	CC	GA	TT
10930	1	44	0	AA	CC	GG	TT
11079	1	30	0	AA	CC	GA	TT
C69	1	19	0	AA	CT	GG	GT
10538	1	28	0	AA	CC	AA	TT
11298	1	43	0	AA	CT	GA	TT
11364	1	36	0	AA	CC	GA	TT
11495	1	24	0	AA	CT	GG	TT
10085	1	39	0	AA	CC	GG	TT
10375	1	31	0	AA	TT	GA	GT
107	1	27	1	TT	CT	AA	TT
122	1	19	1	TA	CC	GA	TT
140	1	44	1	AA	CC	GG	TT
142	1	21	1	AA	CC	GA	TT
167	1	18	1	AA	CT	GA	TT
171	1	34	1	AA	CT	GA	GT
173	1	37	1	AA	CC	GA	TT
175	1	44	1	AA	CT	GG	GT
179	1	17	1	AA	CC	AA	TT
180	1	26	1	TA	CT	GG	TT
182	1	24	1	AA	TT	GA	TT
183	1	29	1	AA	CC	GA	TT
187	1	24	1	AA	CT	GA	TT
233	1	29	1	AA	CT	GG	TT
279	1	39	1	AA	CT	GA	TT
294	1	52	1	AA	CT	GG	TT
359	1	35	1	TA	CT	GG	TT
407	1	40	1	AA	CC	GA	TT
409	1	32	1	AA	TT	GG	GT
413	1	40	1	AA	CC	AA	TT
416	1	43	1	AA	CC	GG	TT
421	1	25	1	AA	CC	GG	TT
432	1	41	1	TA	CT	GA	TT
440	1	35	1	AA	CC	GA	TT
441	1	23	1	AA	CC	GA	TT
443	1	50	1	AA	CT	GA	GT
496	1	17	1	AA	CT	GG	GT
500	1	35	1	AA	CC	GG	TT
503	1	40	1	TA	CT	GG	GT
506	1	34	1	AA	CC	GA	TT
509	1	25	1	AA	CT	GG	TT
569	1	21	1	AA	TT	GA	TT
573	1	35	1	AA	TT	GA	TT
587	1	22	1	AA	CT	GA	GT
600	1	27	1	AA	CT	GG	TT
629	1	15	1	TA	CT	GG	TT
631	1	51	1	AA	CT	GG	GT
641	1	26	1	TA	CT	GA	GT
680	1	67	1	TA	CC	GA	TT
812	1	40	1	AA	CC	GA	TT
885	1	20	1	TA	CC	GA	TT
917	1	17	1	AA	CT	GA	GT
1003	1	35	1	TA	CT	GG	TT
1010	1	27	1	AA	TT	GA	GT
2629	1	55	0	AA	CC	GG	TT
2924	1	69	0	AA	CT	GA	TT
3533	1	48	0	.	CT	GA	TT
3814	1	26	0	AA	CT	.	TT
10062	1	38	0	AA	CT	AA	TT
10071	1	37	0	AA	CT	GG	TT
10074	1	31	0	AA	CT	AA	TT
10157	1	34	0	AA	CT	AA	TT
10263	1	30	0	AA	CC	GA	TT
10269	1	23	0	AA	CC	GG	TT
10277	1	54	0	AA	CT	GA	TT
10303	1	33	0	AA	CT	GA	TT
10374	1	22	0	TA	TT	GG	TT
10510	1	24	0	AA	CT	GG	TT
10512	1	32	0	AA	CC	GG	TT
10525	1	18	0	AA	CT	GA	GT
10527	1	26	0	AA	CT	AA	TT
10546	1	20	0	AA	CC	GG	TT
10551	1	19	0	AA	CC	GA	TT
10554	1	20	0	AA	CC	AA	TT
10574	1	27	0	TA	CC	GG	TT
10624	1	21	0	AA	CC	GA	TT
10696	1	24	0	AA	CT	GG	TT
10705	1	42	0	AA	CC	AA	TT
10715	1	29	0	TA	CC	GA	TT
10716	1	26	0	AA	CT	GG	TT
10742	1	30	0	AA	CT	GA	TT
10776	1	38	0	AA	CT	GG	TT
10790	1	23	0	AA	CT	GG	GT
10845	1	28	0	AA	CT	AA	GT
10909	1	21	0	AA	CC	AA	TT
10912	1	40	0	TA	CC	GA	TT
10943	1	35	0	AA	CC	GA	TT
10949	1	36	0	AA	TT	GG	GG
10951	1	35	0	TA	CC	GA	TT
10960	1	28	0	AA	CC	GA	TT
10975	1	22	0	AA	CC	GA	TT
10976	1	20	0	TA	TT	GA	GT
10978	1	23	0	TA	TT	GA	TT
10980	1	43	0	AA	CT	GG	TT
10985	1	25	0	AA	CT	GG	TT
10995	1	22	0	TA	CT	GA	GT
10996	1	22	0	TA	CT	GA	GT
10997	1	28	0	TT	CT	GG	TT
11005	1	22	0	AA	CC	GA	TT
11039	1	32	0	TA	CC	GG	TT
11055	1	23	0	AA	CT	GA	TT
11056	1	22	0	TA	TT	GG	TT
11064	1	36	0	AA	CC	GG	TT
11068	1	39	0	AA	CC	GA	TT
11073	1	27	0	AA	CC	GA	TT
11074	1	28	0	AA	CT	AA	GT
11075	1	24	0	AA	CT	GA	GT
11076	1	25	0	AA	CC	AA	TT
11080	1	25	0	AA	CT	GA	GT
11180	1	24	0	AA	CT	GA	TT
11221	1	18	0	TA	CC	AA	TT
11241	1	30	0	TA	CT	GG	TT
11269	1	30	0	TA	CC	GG	TT
11272	1	29	0	AA	CT	GG	TT
11280	1	31	0	TA	CT	GA	TT
11307	1	25	0	TA	CT	GG	TT
11347	1	35	0	AA	CC	GG	TT
11354	1	32	0	AA	CT	GG	TT
11388	1	33	0	AA	TT	GA	GT
11389	1	54	0	AA	CC	GG	TT
11420	1	34	0	AA	CT	GA	TT
11427	1	31	0	AA	CC	GG	TT
11428	1	36	0	AA	CT	GG	TT
11458	1	37	0	AA	CC	GA	TT
11500	1	32	0	AA	CC	GG	TT
11525	1	38	0	AA	CC	GA	TT
11551	1	29	0	AA	CT	GG	GT
11562	1	36	0	TA	CC	GA	TT
11794	1	39	0	AA	CC	GA	TT
C17	1	18	0	TA	CT	GG	TT
C178	1	52	0	AA	CT	GA	TT
C185	1	35	0	AA	CT	AA	TT
C216	1	43	0	AA	TT	GG	TT
C231	1	39	0	AA	CT	GA	TT
C235	1	51	0	TA	CC	GA	TT
C241	1	33	0	AA	CT	GA	TT
C244	1	46	0	AA	TT	GA	TT
C247	1	47	0	AA	CT	GG	TT
C261	1	25	0	AA	CT	GG	TT
C262	1	26	0	TA	CC	GA	TT
C264	1	52	0	AA	CC	GG	TT
C342	1	53	0	AA	CC	GG	TT
C355	1	51	0	AA	CT	GA	GT
C359	1	36	0	TA	TT	GG	GT
C370	1	39	0	AA	CT	GG	TT
C440	1	36	0	TA	CC	GG	TT
C467	1	39	0	AA	CT	GG	TT
C522	1	52	0	AA	CT	AA	TT
T10	1	22	1	AA	TT	GA	TT
T11	1	26	1	AA	CT	GA	TT
T3	1	25	1	TA	CC	AA	TT
283	1	23	1	AA	CT	GG	GT
284	1	49	1	AA	CC	AA	TT
406	1	41	1	AA	TT	GG	GT
418	1	22	1	AA	CC	GG	TT
525	1	45	1	AA	CT	GG	TT
581	1	25	1	TA	CC	GG	TT
585	1	23	1	TA	CT	GG	TT
627	1	21	1	AA	TT	GA	GT
839	1	33	1	AA	CC	GA	TT
840	1	43	1	AA	CT	GA	TT
951	1	25	1	TA	CT	GG	TT
1016	1	24	1	AA	CT	GA	TT
1274	1	54	0	AA	CT	GA	TT
10292	1	34	0	AA	CC	GA	TT
10319	1	18	0	AA	CT	GA	TT
10380	1	30	0	AA	TT	GA	GT
10935	1	36	0	AA	CT	GA	GT
10969	1	32	0	AA	TT	AA	GG
10984	1	32	0	AA	CC	AA	TT
11000	1	45	0	AA	CC	GG	TT
11041	1	52	0	AA	CT	GA	TT
11331	1	34	0	AA	CT	GG	GT
11400	1	42	0	AA	CT	AA	TT
11800	1	33	0	AA	CT	GA	GT
C245	1	47	0	AA	CT	GA	GT
C284	1	48	0	AA	CT	GA	GT
C351	1	25	0	AA	CT	GG	TT
C371	1	53	0	AA	CT	GG	GT
C391	1	47	0	AA	CT	GG	TT
C477	1	52	0	TA	CT	GA	TT
181	1	37	1	AA	CC	GG	TT
T19	1	17	1	AA	CC	GA	TT
10486	1	32	0	AA	CT	GG	TT
T2	1	36	1	AA	CT	GG	GT
523	1	37	1	TA	CC	GA	TT
10977	1	22	0	AA	CT	GA	GT
10202	1	19	0	AA	CC	GG	TT
10513	1	29	0	TA	CC	AA	TT
10708	1	30	0	AA	TT	GA	GT
10874	1	29	0	TT	CT	AA	TT
10956	1	44	0	TA	CC	GA	TT
11304	1	24	0	AA	.	GG	TT
11519	1	37	0	TA	CC	GG	TT
10287	1	43	0	TA	CC	GA	TT
55	2	28	1	AA	CT	GA	TT
80	2	38	1	AA	CT	GA	.
189	2	23	1	AA	CC	AA	TT
209	2	36	1	AA	CT	GG	GT
235	2	52	1	AA	CT	GG	TT
239	2	35	1	AA	CC	AA	TT
242	2	24	1	TA	TT	GA	GG
252	2	17	1	AA	CT	GG	GT
547	2	24	1	TA	TT	GA	TT
562	2	18	1	AA	CT	GA	TT
617	2	37	1	AA	CC	GG	TT
647	2	36	1	TA	CT	GA	TT
1070	2	56	1	AA	CT	GA	GG
1136	2	30	1	AA	TT	GG	GT
1138	2	29	1	TA	CT	GG	.
18	2	34	1	AA	CT	GA	GT
1069	2	55	1	AA	CC	GA	TT
10060	2	26	0	AA	CC	GG	TT
13	2	56	1	.	.	GG	.
19	2	21	1	TA	.	.	.
22	2	49	1	.	.	.	.
23	2	26	1	AA	CT	GA	TT
32	2	32	1	AA	CT	GG	.
73	2	23	1	.	.	.	.
77	2	29	1	AA	CC	.	.
82	2	43	1	TA	CC	GG	.
248	2	36	1	AA	.	.	.
249	2	28	1	.	.	.	.
251	2	18	1	.	.	.	.
275	2	37	1	AA	CC	GA	TT
738	2	21	1	AA	TT	GA	GG
914	2	51	1	AA	CC	GG	.
1067	2	61	1	.	.	.	.
1071	2	36	1	.	.	.	.
1108	2	39	1	AA	CT	GG	.
1109	2	46	1	AA	.	.	.
1111	2	16	1	TA	.	GA	.
1115	2	42	1	TA	CC	GA	.
1118	2	39	1	AA	CT	.	.
1125	2	56	1	.	.	.	.
1131	2	16	1	AA	.	.	.
1139	2	41	1	AA	.	.	.
1140	2	22	1	.	.	.	.
1141	2	31	1	.	.	.	.
1142	2	17	1	TA	CC	.	.
1148	2	37	1	TA	CT	GG	.
1158	2	52	1	AA	CC	GG	.
1160	2	49	1	.	.	.	.
1161	2	42	1	.	.	.	.
10068	2	34	0	.	.	.	.
534	2	64	1	AA	CT	GG	TT
1127	2	46	1	AA	CC	GG	TT
1156	2	18	1	AA	CT	GG	TT
1165	2	25	1	AA	CC	AA	TT
939	2	22	1	AA	CT	GG	GT
106	2	37	1	AA	CC	GA	TT
323	2	45	1	AA	CC	GG	TT
334	2	29	1	AA	CT	AA	TT
345	2	38	1	TA	CT	GA	GT
354	2	25	1	TA	CC	GG	TT
414	2	24	1	AA	CT	GA	GT
454	2	26	1	AA	TT	GG	GT
461	2	55	1	AA	CT	GA	TT
470	2	24	1	AA	CT	GG	GG
488	2	31	1	AA	CT	GA	TT
493	2	21	1	TA	CT	GG	TT
795	2	30	1	TA	CC	GA	TT
841	2	37	1	AA	TT	GA	TT
859	2	22	1	TA	CT	GA	TT
880	2	27	1	AA	CC	GG	TT
908	2	19	1	AA	CC	AA	TT
991	2	29	1	AA	TT	GA	GT
1020	2	35	1	TA	CT	AA	TT
1137	2	55	1	AA	CT	GA	TT
1163	2	38	1	AA	CT	GA	.
1170	2	42	1	AA	TT	GG	GG
10159	2	23	0	AA	CT	GG	GT
205	2	49	1	AA	CT	GG	TT
388	2	24	1	AA	CT	GG	TT
462	2	22	1	AA	TT	GG	TT
466	2	19	1	AA	CT	GA	TT
490	2	39	1	AA	CT	GA	GT
756	2	32	1	AA	CT	AA	GG
763	2	21	1	AA	CC	GA	TT
791	2	34	1	AA	TT	GA	TT
915	2	14	1	TA	CT	GG	TT
1124	2	31	1	TA	CC	GA	TT
1112	2	36	1	AA	CC	GA	TT
324	2	32	1	AA	CC	GG	TT
221	2	39	1	AA	CC	GA	TT
234	2	24	1	AA	CC	GA	TT
329	2	48	1	AA	CT	GA	TT
351	2	28	1	TA	CC	GG	TT
464	2	27	1	AA	CT	GA	TT
467	2	55	1	AA	CC	GG	TT
468	2	18	1	TA	CT	GA	TT
471	2	26	1	AA	CC	GG	TT
472	2	23	1	AA	CC	GG	TT
489	2	49	1	AA	CC	GA	TT
491	2	42	1	AA	CC	GG	TT
545	2	43	1	AA	CT	GG	TT
693	2	25	1	AA	CC	GA	TT
728	2	47	1	AA	CT	GA	TT
854	2	22	1	AA	TT	GA	GT
868	2	25	1	TA	CC	GG	TT
877	2	28	1	TA	CT	GG	TT
903	2	39	1	TA	CC	GG	TT
1074	2	61	1	AA	CT	AA	TT
1079	2	58	1	AA	CC	GG	TT
1080	2	55	1	AA	CC	GG	TT
1086	2	36	1	AA	CT	GA	TT
1113	2	56	1	AA	CT	GA	GT
1130	2	40	1	TA	CC	GA	TT
1154	2	36	1	AA	CT	GA	TT
1155	2	46	1	AA	CC	GA	TT
1159	2	38	1	TA	CT	GG	GT
1162	2	36	1	AA	CT	GA	TT
261	2	30	1	AA	CT	GA	GT
352	2	16	1	AA	CT	GA	TT
762	2	27	1	AA	CC	GA	TT
865	2	37	1	AA	CT	GG	GT
1102	2	39	1	AA	CC	GG	TT
1145	2	26	1	TA	CT	GG	TT
1134	2	39	1	AA	TT	GG	GT
1149	2	48	1	AA	CT	GA	TT
T6	2	21	1	AA	CT	GG	TT
14	2	54	1	AA	CT	GG	TT
17	2	32	1	AA	CT	GA	GT
20	2	41	1	AA	CT	GG	TT
21	2	19	1	AA	CT	GG	TT
78	2	38	1	TA	CC	GG	TT
188	2	23	1	AA	TT	GG	GT
218	2	37	1	AA	CC	GA	TT
225	2	17	1	AA	TT	GA	TT
255	2	33	1	AA	TT	GA	GT
301	2	48	1	AA	CC	GA	TT
311	2	33	1	AA	CC	AA	TT
336	2	30	1	AA	CT	GG	TT
337	2	28	1	AA	CT	GG	TT
434	2	58	1	TA	CC	GA	TT
469	2	28	1	TA	CT	GG	TT
477	2	36	1	AA	CC	AA	TT
532	2	12	1	AA	TT	GG	GT
538	2	42	1	AA	CT	GG	TT
544	2	35	1	AA	TT	GA	TT
548	2	26	1	AA	TT	GG	TT
552	2	18	1	AA	CC	GA	TT
553	2	24	1	AA	CT	GA	TT
596	2	27	1	AA	TT	GA	GT
599	2	22	1	AA	CC	GA	TT
601	2	32	1	AA	TT	GA	GT
613	2	52	1	AA	CT	GG	GT
614	2	25	1	AA	CT	GG	TT
686	2	18	1	AA	CT	GG	GT
687	2	37	1	AA	TT	GA	TT
786	2	24	1	AA	CT	AA	GT
927	2	51	1	AA	CC	GA	TT
949	2	23	1	TA	CT	GA	GT
1014	2	26	1	AA	CT	GG	TT
1117	2	39	1	TA	CT	GG	GT
1210	2	26	0	AA	CT	GG	TT
1221	2	29	0	TA	CC	AA	TT
1224	2	31	0	TA	CT	AA	TT
1226	2	33	0	AA	TT	GA	GT
1280	2	51	0	AA	TT	GA	GG
1512	2	50	0	AA	CT	GA	TT
1580	2	33	0	AA	CT	GA	GT
1607	2	50	0	AA	TT	GA	GT
1634	2	32	0	AA	CT	AA	TT
1703	2	51	0	AA	CT	GG	GT
1706	2	51	0	AA	TT	GA	TT
1840	2	32	0	AA	CT	GA	GT
1921	2	33	0	AA	CT	GG	TT
1983	2	33	0	AA	CC	AA	TT
1994	2	29	0	AA	CT	AA	TT
2033	2	52	0	AA	CC	GA	TT
2082	2	42	0	AA	TT	GG	GT
2129	2	60	0	TA	CT	AA	GT
2169	2	52	0	AA	CT	GA	TT
2216	2	58	0	TA	CT	GA	TT
2301	2	31	0	AA	TT	GA	TT
2372	2	32	0	TA	CC	GG	TT
2392	2	27	0	AA	CC	GA	TT
2503	2	34	0	AA	CT	GA	GT
2542	2	26	0	AA	CT	GA	GT
2978	2	27	0	AA	CC	GG	TT
3070	2	57	0	AA	TT	AA	GT
3141	2	53	0	TA	TT	GA	GT
3324	2	58	0	AA	CT	GG	TT
3335	2	31	0	TA	CC	GG	TT
3379	2	28	0	TA	TT	GA	TT
3428	2	47	0	AA	CT	GA	TT
3457	2	58	0	AA	CT	GA	TT
3496	2	51	0	AA	TT	GA	TT
3498	2	53	0	AA	CT	GG	GT
3516	2	31	0	AA	CT	GG	GT
3523	2	31	0	AA	CC	GG	TT
3537	2	53	0	AA	CC	GG	TT
3541	2	62	0	AA	CT	GA	TT
3571	2	24	0	AA	CC	GA	TT
3661	2	57	0	AA	CC	GG	TT
3665	2	51	0	AA	CT	GG	TT
3792	2	31	0	TA	CT	GG	GT
3793	2	51	0	AA	CT	GA	GT
3800	2	51	0	AA	CC	GA	TT
3810	2	59	0	TA	CT	GG	GT
3834	2	41	0	AA	TT	GG	TT
3849	2	52	0	TA	CC	GA	TT
3988	2	32	0	AA	CT	GA	GT
4100	2	33	0	AA	TT	AA	TT
4106	2	47	0	AA	TT	GG	TT
4116	2	55	0	AA	CT	GG	TT
4121	2	20	0	AA	TT	GG	TT
10002	2	27	0	AA	CT	GG	TT
10135	2	24	0	AA	TT	GG	TT
10136	2	31	0	AA	TT	GG	TT
10137	2	25	0	AA	CT	GG	GT
10144	2	28	0	AA	CT	GA	TT
10150	2	28	0	AA	CT	GA	TT
10173	2	21	0	TA	CT	AA	GT
10174	2	20	0	AA	CT	GG	GT
10179	2	22	0	TA	CC	GG	TT
10204	2	19	0	AA	CC	GA	TT
10320	2	28	0	AA	CT	GG	GT
10322	2	24	0	AA	CC	GA	TT
10332	2	23	0	AA	CC	AA	TT
10334	2	24	0	AA	CT	GG	TT
10350	2	25	0	AA	CC	GA	TT
10354	2	24	0	AA	TT	AA	TT
10363	2	43	0	AA	CC	GA	TT
10366	2	27	0	AA	CC	GG	TT
10442	2	32	0	AA	CT	GG	TT
10450	2	32	0	TA	CC	GG	TT
10477	2	18	0	AA	CC	GA	TT
10495	2	32	0	AA	CC	GG	TT
10585	2	28	0	AA	CT	GG	TT
10586	2	47	0	TA	CC	GA	TT
10632	2	19	0	TA	CT	GG	TT
10678	2	21	0	TA	CT	GA	TT
11223	2	34	0	AA	CT	GA	TT
30006	2	29	1	AA	CT	GG	TT
40006	2	46	1	AA	CT	GA	TT
C1046	2	49	0	AA	CC	GA	TT
C1059	2	59	0	AA	TT	GG	TT
C1083	2	33	0	AA	TT	GG	TT
C1110	2	41	0	TA	CT	GG	TT
C1121	2	33	0	AA	CT	AA	TT
C1153	2	58	0	AA	CT	GA	TT
C1175	2	26	0	AA	CT	GA	TT
C1176	2	35	0	AA	CC	GA	TT
C1186	2	42	0	AA	TT	GG	GG
C1187	2	30	0	AA	CT	GG	TT
C613	2	50	0	TA	CC	GG	TT
C658	2	48	0	AA	CT	GG	GT
C668	2	33	0	AA	CT	GG	GT
C684	2	33	0	AA	CC	GG	TT
C691	2	32	0	AA	CT	GG	GT
C699	2	45	0	AA	CT	GA	TT
C701	2	36	0	AA	CC	GA	GT
C712	2	36	0	AA	CC	GG	TT
C722	2	38	0	AA	CC	GG	TT
C750	2	31	0	TA	CT	GA	GT
C767	2	32	0	AA	TT	GG	TT
C815	2	36	0	AA	CT	GG	TT
C848	2	38	0	AA	CC	GG	TT
C862	2	36	0	AA	CT	GA	TT
C864	2	32	0	AA	CC	GG	TT
C870	2	45	0	TA	CT	GG	TT
C885	2	44	0	AA	CT	GA	TT
C913	2	42	0	TA	CT	GA	TT
C935	2	45	0	AA	CC	GA	TT
Z16	2	21	0	AA	CT	GG	TT
Z21	2	28	0	AA	CC	GG	TT
Z8	2	21	0	AA	CC	GG	TT
Z9	2	18	0	AA	CC	GA	TT
120	2	16	1	TA	CC	GA	TT
226	2	38	1	AA	CT	GA	GT
257	2	36	1	AA	TT	GG	GT
495	2	17	1	AA	CT	GG	GT
603	2	32	1	AA	CT	GG	GT
875	2	31	1	AA	TT	GG	GT
947	2	14	1	AA	TT	GG	GT
1239	2	25	0	AA	CC	GG	TT
1516	2	31	0	AA	CC	GA	TT
1610	2	60	0	AA	CC	GA	TT
1712	2	51	0	AA	CT	GG	GT
1821	2	55	0	AA	CT	GA	TT
1831	2	44	0	AA	CT	GG	GT
1936	2	27	0	AA	CC	GA	TT
2023	2	53	0	AA	CT	AA	TT
2202	2	32	0	AA	CC	AA	TT
2424	2	51	0	AA	TT	GG	GT
3019	2	49	0	AA	CC	GG	TT
3816	2	50	0	AA	CT	GA	TT
3825	2	47	0	AA	CT	GA	TT
4038	2	50	0	TA	CT	GG	GT
4135	2	29	0	AA	CT	GA	GT
10001	2	27	0	AA	CT	GA	TT
10047	2	21	0	TA	TT	GG	GT
10147	2	28	0	TA	CC	GG	TT
10270	2	52	0	AA	CC	GA	TT
10352	2	21	0	TA	CC	AA	TT
10436	2	28	0	AA	CC	GA	TT
10449	2	25	0	AA	CC	GA	TT
C1010	2	34	0	AA	TT	GG	GT
C1074	2	41	0	TA	TT	GG	TT
C1139	2	39	0	TA	CC	AA	TT
C1188	2	25	0	AA	CC	GG	TT
3687	2	41	0	AA	CT	GG	GT
10310	2	31	0	TA	CT	AA	TT
11245	2	18	0	AA	TT	GA	GT
40026	2	47	1	AA	CC	GA	TT
610	2	29	1	AA	CT	GA	TT
40099	2	45	1	TA	TT	GA	GT
451	2	18	1	AA	CT	GA	TT
561	2	24	1	AA	CC	GA	TT
953	2	41	1	AA	CC	GA	TT
10057	2	23	0	AA	CT	GG	TT
10467	2	24	0	AA	CT	AA	TT
10644	2	34	0	AA	CT	AA	TT
11549	2	34	0	AA	CT	GG	GT
11579	2	32	0	TA	CC	GG	TT
30008	2	46	1	AA	CT	GA	TT
30029	2	46	1	AA	CC	GA	TT
40013	2	46	1	AA	CC	GA	TT
40061	2	45	1	AA	TT	GA	TT
40119	2	45	1	AA	CT	GA	GT
40142	2	45	1	TA	CC	GG	TT
40170	2	46	1	AA	CT	AA	GT
10863	2	32	0	AA	CT	GA	GT
11596	2	32	0	AA	TT	GA	GT
40197	2	47	1	AA	TT	GG	GT
81	2	29	1	TA	TT	AA	TT
317	2	27	1	AA	TT	GG	TT
513	2	29	1	AA	CC	GA	TT
1088	2	28	1	AA	CC	GG	TT
10086	2	30	0	AA	CC	AA	TT
10128	2	22	0	AA	CT	GG	TT
10321	2	34	0	TA	CC	AA	TT
10383	2	22	0	AA	CT	GG	TT
10761	2	52	0	AA	CT	GG	GT
10868	2	27	0	AA	CT	GA	GT
11244	2	22	0	AA	CT	GA	TT
11301	2	21	0	AA	CT	AA	GT
11580	2	28	0	AA	CT	GA	TT
11595	2	34	0	AA	CT	GA	.
11627	2	21	0	TA	TT	GG	GT
30007	2	42	1	AA	TT	GG	GT
30009	2	55	1	AA	CT	GA	TT
30016	2	32	1	AA	CC	AA	TT
30021	2	48	1	AA	CC	GA	TT
30026	2	25	1	AA	CT	GG	TT
30028	2	46	1	AA	TT	GG	TT
40002	2	47	1	AA	CC	GA	TT
40018	2	46	1	TA	CC	GG	TT
40019	2	46	1	AA	CT	GA	TT
40029	2	45	1	AA	CC	GG	TT
40031	2	47	1	TA	CC	GA	TT
40033	2	45	1	TA	CC	GA	TT
40060	2	47	1	AA	CT	GA	GT
40088	2	47	1	AA	CT	AA	TT
40097	2	46	1	AA	CC	GA	TT
40100	2	45	1	TA	CT	AA	GT
40120	2	48	1	AA	CC	AA	TT
40128	2	48	1	AA	CT	GA	TT
40144	2	46	1	AA	CC	GG	TT
40146	2	47	1	AA	CC	GA	TT
40168	2	48	1	AA	CC	GG	TT
40172	2	47	1	AA	CT	GA	TT
40195	2	45	1	AA	CC	GA	TT
40196	2	45	1	AA	TT	GG	TT
10373	2	18	0	AA	CT	AA	GT
30027	2	49	1	AA	CT	GA	GT
40052	2	46	1	AA	TT	GA	GT
40143	2	47	1	AA	CT	GA	GT
40145	2	46	1	AA	CT	GA	GT
40169	2	47	1	AA	CC	GG	TT
40075	2	48	1	AA	CC	GG	TT
16	2	20	1	AA	CT	GA	GT
101	2	25	1	AA	TT	GA	GT
316	2	51	1	AA	CT	GA	TT
342	2	45	1	TA	CT	GA	TT
446	2	26	1	AA	CT	GG	TT
483	2	23	1	TA	CC	GG	TT
492	2	27	1	AA	TT	AA	TT
550	2	44	1	AA	CT	GG	TT
2353	2	75	0	AA	CT	AA	TT
10541	2	27	0	AA	CT	GG	TT
10593	2	23	0	AA	CT	GG	TT
10667	2	22	0	AA	TT	GG	GT
10807	2	21	0	TA	TT	GA	TT
10826	2	20	0	AA	CT	GG	TT
10840	2	35	0	AA	CC	GA	TT
10857	2	35	0	AA	CT	GA	GT
10952	2	20	0	AA	CC	GG	TT
10955	2	28	0	AA	TT	GG	GT
11302	2	28	0	AA	TT	AA	GT
11355	2	34	0	AA	CT	GG	GT
C291	2	31	0	TA	CC	GA	TT
C307	2	30	0	TT	CC	GA	TT
C657	2	45	0	AA	TT	GG	GT
C661	2	30	0	AA	CT	GG	TT
C707	2	48	0	AA	CT	GG	TT
219	2	26	1	AA	TT	GA	TT
475	2	32	1	AA	CC	GG	TT
558	2	33	1	AA	CC	GG	TT
10351	2	18	0	AA	CC	GG	TT
10659	2	34	0	TA	CT	GG	TT
10753	2	31	0	AA	CT	GG	GT
11207	2	25	0	AA	CC	GA	TT
10356	2	25	0	AA	TT	GA	GT
1019	2	24	1	AA	CT	GG	GT
114	2	32	1	AA	TT	GA	GT
204	2	30	1	AA	CT	GA	TT
207	2	24	1	AA	CT	AA	TT
304	2	53	1	AA	TT	GG	GT
312	2	22	1	AA	CT	GA	TT
319	2	28	1	TT	TT	GA	TT
330	2	41	1	TA	CT	GA	TT
341	2	39	1	AA	TT	.	TT
343	2	38	1	AA	TT	GG	GG
402	2	54	1	AA	CC	GG	TT
456	2	34	1	AA	CT	AA	TT
463	2	60	1	AA	TT	GG	TT
474	2	35	1	TA	CC	GA	TT
481	2	34	1	AA	TT	GG	GT
485	2	41	1	AA	CT	GG	TT
486	2	19	1	AA	CT	GA	TT
487	2	23	1	AA	CC	GG	TT
514	2	31	1	AA	TT	AA	TT
527	2	53	1	AA	CC	GG	TT
551	2	34	1	AA	CT	GA	TT
554	2	20	1	AA	CT	GG	TT
563	2	16	1	AA	CT	GA	TT
874	2	35	1	AA	CC	GA	TT
940	2	24	1	AA	CT	GG	GT
1075	2	22	1	TA	CC	GA	TT
1078	2	50	1	AA	CC	GA	TT
2218	2	41	0	AA	TT	GA	TT
2244	2	42	0	AA	CT	GA	TT
4103	2	18	0	AA	CT	GG	TT
10317	2	24	0	AA	CC	GG	TT
10463	2	22	0	AA	CT	GG	GT
10479	2	20	0	AA	CC	GA	TT
10519	2	27	0	AA	CC	GA	TT
10522	2	27	0	TA	CT	GA	TT
10622	2	19	0	AA	CC	GA	TT
10627	2	18	0	AA	CT	GA	TT
10631	2	19	0	AA	CT	GA	TT
10634	2	28	0	AA	CT	GG	TT
10704	2	34	0	AA	CT	GG	GT
10767	2	19	0	AA	TT	GG	GT
10794	2	27	0	TA	CT	GG	TT
10811	2	22	0	AA	CC	GA	TT
10820	2	23	0	TA	CT	GG	TT
10842	2	35	0	TA	CT	AA	GT
10858	2	31	0	AA	CT	GA	TT
10916	2	34	0	AA	CT	GG	TT
11059	2	25	0	AA	CT	GA	TT
11093	2	26	0	AA	TT	GG	TT
11279	2	32	0	AA	CT	GG	TT
11296	2	34	0	AA	CC	GA	TT
11357	2	42	0	AA	CT	GA	TT
11365	2	28	0	TA	CC	GA	TT
11372	2	26	0	AA	CT	AA	TT
11378	2	29	0	TA	TT	GG	GT
C1169	2	26	0	AA	TT	GG	GT
C1561	2	39	0	AA	CT	GG	GT
C229	2	25	0	AA	CT	GG	TT
C236	2	47	0	AA	CC	AA	TT
C239	2	42	0	AA	CT	GG	TT
C266	2	30	0	TA	CC	GG	TT
C267	2	40	0	TA	TT	GG	GG
C287	2	46	0	AA	CT	GG	TT
C293	2	35	0	AA	CC	GG	TT
C296	2	31	0	AA	CT	GA	TT
C315	2	29	0	AA	CT	GA	TT
C412	2	26	0	AA	CC	GA	TT
C413	2	26	0	AA	TT	GG	GT
C428	2	45	0	TA	CC	GA	TT
C465	2	32	0	AA	CC	GG	TT
C509	2	32	0	AA	CT	GA	TT
C621	2	40	0	AA	CC	GG	TT
C629	2	36	0	AA	CT	GG	TT
C634	2	32	0	AA	CC	AA	TT
C683	2	55	0	AA	CT	GA	TT
C813	2	35	0	AA	CC	GA	TT
C944	2	40	0	AA	CT	GG	TT
75	2	34	1	AA	TT	GG	GT
112	2	42	1	AA	CC	GG	TT
212	2	30	1	AA	CT	GG	GT
213	2	46	1	AA	CT	GA	GT
305	2	27	1	AA	TT	GG	GG
308	2	27	1	AA	CT	GG	GG
626	2	15	1	TA	CC	AA	TT
10097	2	30	0	AA	CC	GG	TT
10592	2	22	0	AA	CC	GA	TT
10652	2	18	0	AA	CT	GG	TT
10815	2	23	0	AA	CC	GG	TT
11104	2	23	0	AA	CC	GG	TT
11253	2	27	0	AA	CT	GG	TT
11297	2	28	0	AA	CT	AA	TT
C1113	2	43	0	AA	CT	GA	GT
C280	2	46	0	AA	CC	GA	TT
C289	2	43	0	AA	CT	GG	GT
C462	2	30	0	AA	CC	GA	TT
C624	2	38	0	AA	CC	GG	TT
10575	2	21	0	AA	CT	GA	GT
10054	2	29	0	AA	CC	GG	TT
11299	2	21	0	AA	CT	GA	GT
11444	2	31	0	AA	CT	GG	TT
11629	2	31	0	AA	CT	GA	TT
56	2	24	1	AA	CT	GG	GT
62	2	43	1	AA	TT	GA	TT
110	2	55	1	TA	CT	GA	TT
123	2	31	1	AA	CT	GA	TT
190	2	41	1	AA	CT	GA	TT
193	2	31	1	AA	TT	GA	GG
208	2	26	1	AA	CT	AA	TT
220	2	37	1	TA	CC	AA	TT
303	2	21	1	AA	CT	GA	GT
306	2	40	1	AA	CT	GG	TT
309	2	52	1	TA	CC	GG	TT
325	2	37	1	TA	CC	GA	TT
326	2	37	1	AA	CT	GA	TT
333	2	59	1	AA	CT	GG	TT
340	2	43	1	AA	CC	GA	TT
348	2	15	1	TA	CC	GA	TT
357	2	22	1	AA	CC	AA	TT
435	2	23	1	AA	CT	GA	TT
453	2	33	1	TA	CT	GG	TT
476	2	37	1	AA	TT	GG	TT
478	2	45	1	AA	CT	GA	GT
479	2	26	1	AA	TT	GA	TT
529	2	34	1	AA	CC	GA	TT
531	2	31	1	AA	CT	GG	TT
535	2	54	1	AA	CT	AA	TT
537	2	23	1	AA	CT	GG	TT
541	2	37	1	AA	CT	GA	GT
557	2	29	1	AA	CC	GG	TT
564	2	14	1	AA	CT	GA	GT
598	2	33	1	AA	CT	GG	TT
602	2	32	1	AA	CT	GG	GG
604	2	30	1	TA	CT	GG	TT
612	2	18	1	AA	CT	GG	TT
792	2	48	1	AA	CT	GG	GT
876	2	55	1	TA	CT	GA	TT
983	2	60	1	AA	CT	GG	TT
1008	2	56	1	AA	CT	GG	GT
1021	2	19	1	AA	CT	GG	TT
1027	2	19	1	AA	CC	GA	TT
1092	2	24	1	AA	CT	GA	GT
1119	2	48	1	AA	CT	AA	TT
2081	2	38	0	AA	TT	GA	TT
2156	2	54	0	TA	TT	GA	GT
2354	2	70	0	AA	CC	GA	TT
3412	2	52	0	AA	CT	GG	TT
3902	2	51	0	TA	CT	GG	TT
10178	2	19	0	AA	CC	GG	TT
10343	2	19	0	AA	CT	GA	TT
10345	2	28	0	TA	CC	GA	TT
10453	2	18	0	AA	CT	GG	TT
10459	2	28	0	AA	CT	GA	TT
10466	2	27	0	AA	CT	GA	GT
10475	2	19	0	AA	CC	GG	TT
10542	2	34	0	AA	CT	AA	TT
10550	2	31	0	AA	CT	GA	TT
10562	2	24	0	AA	CT	GA	TT
10583	2	27	0	TA	CC	AA	TT
10612	2	32	0	AA	CC	GA	TT
10613	2	24	0	AA	CT	GA	TT
10623	2	23	0	AA	CT	GG	GT
10637	2	32	0	AA	CT	GA	TT
10643	2	18	0	AA	CT	GG	TT
10650	2	23	0	TA	CC	GA	TT
10661	2	27	0	TA	CC	GA	TT
10721	2	52	0	TA	CT	GG	TT
10735	2	22	0	AA	CC	GG	TT
10738	2	24	0	AA	CT	GA	TT
10745	2	52	0	AA	TT	GA	GT
10751	2	26	0	AA	CT	GG	GT
10810	2	23	0	TA	CT	GA	GT
10814	2	28	0	AA	CT	GG	TT
10816	2	25	0	AA	TT	GG	GT
10819	2	24	0	AA	TT	GG	GT
10825	2	23	0	AA	CT	AA	TT
10828	2	22	0	AA	CC	GG	TT
10850	2	34	0	AA	CC	GA	TT
10873	2	32	0	AA	TT	GA	GT
10894	2	34	0	AA	CT	GA	TT
11002	2	22	0	AA	CC	GA	TT
11021	2	34	0	AA	CC	GG	TT
11090	2	34	0	AA	CT	GG	TT
11251	2	25	0	AA	CC	AA	TT
11356	2	28	0	TT	TT	GG	TT
11456	2	35	0	TA	CT	GA	TT
11527	2	35	0	TA	CT	GA	TT
40001	2	47	1	AA	CC	GA	TT
40010	2	45	1	AA	TT	GA	TT
C1071	2	35	0	AA	TT	GG	TT
C1181	2	37	0	TA	TT	GG	TT
C1185	2	37	0	AA	CC	GG	TT
C1216	2	60	0	AA	CC	GA	TT
C1402	2	60	0	AA	CC	GA	TT
C223	2	23	0	TA	CC	GA	TT
C272	2	27	0	AA	TT	GG	GT
C277	2	38	0	AA	CC	GG	TT
C294	2	38	0	AA	CT	GG	TT
C295	2	48	0	AA	TT	GA	GT
C303	2	28	0	AA	CT	GG	GT
C432	2	43	0	AA	CC	GG	TT
C443	2	29	0	AA	CT	GG	TT
C480	2	27	0	AA	CC	AA	TT
C569	2	36	0	AA	CT	GA	GT
C588	2	39	0	AA	CT	GG	GT
C604	2	33	0	AA	CC	GG	TT
C660	2	30	0	AA	CT	GA	TT
C714	2	52	0	AA	TT	GA	GT
C947	2	37	0	AA	CT	GG	TT
T12	2	18	1	AA	CT	GA	GT
T17	2	28	1	AA	CT	AA	TT
T18	2	26	1	AA	CC	GA	TT
T20	2	21	1	AA	CC	GA	TT
T4	2	34	1	AA	CT	GG	TT
Z22	2	26	0	TA	CC	GA	TT
31	2	32	1	AA	CT	AA	TT
76	2	52	1	AA	CT	GG	GT
210	2	32	1	AA	CT	GG	TT
355	2	33	1	AA	CT	GG	TT
473	2	26	1	TA	CT	AA	TT
482	2	24	1	AA	CT	GA	TT
608	2	19	1	AA	CT	GG	TT
872	2	27	1	AA	.	.	TT
2091	2	67	0	AA	CC	GG	TT
10171	2	51	0	AA	CC	GG	TT
10184	2	19	0	AA	CC	GA	TT
10457	2	31	0	AA	CC	GG	TT
10630	2	20	0	AA	CT	GG	GT
10654	2	34	0	AA	TT	GG	TT
11247	2	35	0	TA	CC	GG	TT
11486	2	22	0	AA	CT	GG	GT
40053	2	46	1	AA	CC	GA	TT
C188	2	42	0	TA	CC	GA	TT
C290	2	30	0	TA	CC	GA	TT
C346	2	38	0	AA	CT	GA	TT
C590	2	44	0	AA	CC	AA	TT
C598	2	33	0	AA	CT	GA	GT
C636	2	30	0	AA	CT	GA	GT
C639	2	35	0	AA	CT	GG	GT
Z13	2	34	0	AA	CC	GA	TT
452	2	28	1	AA	CC	GG	TT
873	2	57	1	AA	CC	GA	TT
10359	2	23	0	AA	CC	AA	TT
10728	2	34	0	TA	TT	GA	TT
10823	2	28	0	AA	CT	GA	TT
10360	2	18	0	AA	TT	GG	TT
10808	2	18	0	AA	CC	GG	TT
10822	2	26	0	AA	CC	GA	TT
